# Supplementary material for: High Frequency of ERBB2 Activating Mutations in Invasive Lobular Breast Carcinoma with Pleomorphic Features
Source: Cancers (Basel). 2019 Jan 11;11(1):74. doi: 10.3390/cancers11010074 (PMC6356653; doi:10.3390/cancers11010074)
Supplement: Supplementary file 1 [file cancers-11-00074-s001.zip › Cancers-399636-Supplementary Tables.xlsx]

## Sheet: Index
Supplementary tables
Table S1	Clinicopathological and immunohistochemical features of the 27 PLC studied
Table S2	List of antibodies used to characterise PLC tumours
Table S3	List of mutations found in the invasive component of the 27 PLCs subjected to NGS analysis
Table S4	Estimation of LOH status based on the calculation of Ti
Table S5	List of infrequent germline variants identified in the 27 PLCs subjected to NGS analysis
Table S6	List of mutations found in the different components of 10 PLCs subjected to NGS analysis

## Sheet: Table S1
																Table S1	Clinicopathological and immunohistochemical features of the 27 PLC studied
	Case	Age at diagnosis (years)	Additional Available Samples			Location (Breast)	Size (cm)	Lymph Node	Payhologic Stage	Clinical Stage	Follow up (months)	Relapse	Deceased	Pattern	Cell	Apocrine	Grade	Mitotic_Index	CK19	Subtype	ER (Intensity)	PR (Intensity)	AR (Intensity)	Ki67	HER2	E-cadherin	ARID1A (Intensity)	ARIDB (Intensity)	Cicline D1	beta-catenine	p120	CD8	PDL1 28-8	PDL1 22C3
			In-situ	Lymph Node Metastasis	Local Relapse		Size	Lymph Node	Payhologic Stage	Clinical Stage	Follow up (months)	Relapse	Deceased	Pattern	Cell	Apocrine	Grade	Mitotic_Index	CK19		ER	PR	AR	Ki67(%)	HER2	E-cadherin	Arid1a	Arid1a	Cicline D1	bCat	p120	CD8	PDL1 28-8	PDL1 22C3
	PLC-1	53	-	-	-	Right	1.3	N0	IA	IIB	88	No	No	Solid	NOS	No	3	2	1	Luminal A	10% (1)	35% (2)	20% (1)	0.02	1	Negative	100% (3)	100% (2)	Positive 90%	Weak Cytoplasm	C	34	Negative	Negative
	PLC-2	83	-	-	-	Right	3.5	N0	IIA	IIB	78	No	No	Solid	NOS	No	3	3	1	Triple Negative	Negative	Negative	70% (1)	0.01	0	Negative	100% (3)	100% (2)	Positive 90%	Negative	C	47	Negative	Negative
	PLC-3	70	-	-	-	Right	3.5	N1	IIB	IA	66	No	No	Solid	NOS	No	2	1	1	Luminal A	65%(2)	85% (3)	85%(2)	0.1	0	Negative	100% (3)	100% (2)	Positive 70%	Negative	C	41	Negative	Negative
	PLC-4	39	-	-	-	Right	2.8	N1	IIB	IIA	60	No	No	Trabecular	NOS	No	3	3	1	Luminal A	65% (2)	60% (2)	60% (2)	0.04	0	Negative	100% (3)	100% (1)	Positive 100%	Negative	C	7	Negative	Negative
	PLC-5	66	-	-	-	Left	3	N0	IIA	IIA	59	Yes	No	Solid	NOS	No	3	3	1	Luminal B	90%(3)	Negative	20% (1)	0.31	0	Aberrant	100% (3)	100% (2)	Positive 40%	Moderate Cytoplasm	C	13	Negative	Negative
	PLC-6	42	-	-	-	Left	2.4	N0	IIA	IIA	43	No	No	Classic	NOS	No	2	1	1	Luminal A	Negative	40% (2)	Negative	0.01	0	Negative	100% (3)	100% (2)	Positive 40%	Negative	M weak	30	Negative	Negative
	PLC-7	73	-	-	-	-	4.5	NX	Unknown	IIA	34	No	No	Classic	Apocrine	Yes	3	2	1	Triple Negative	Negative	Negative	70% (1)	0.03	0	Aberrant	100% (3)	100% (2)	Negative 3%	Moderate Membrane	M	25	Negative	Negative
	PLC-8	58	-	-	-	Left	3.3	N0	IIA	IIA	52	Yes	No	Trabecular	Histyocitoid	No	2	1	1	Luminal A	65%(2)	90% (3)	45% (1)	0.06	2	Negative	100% (3)	100% (2)	Positive 70%	Negative	C+N	24	Negative	Negative
	PLC-9	63	-	-	-	Left	3.2	N1	IIB	IIA	45	No	No	Trabecular	NOS	No	2	1	1	Luminal A	75% (2)	60% (3)	10% (1)	0.07	0	Negative	100% (3)	100% (2)	Positive 90%	Negative	C	38	Negative	Negative
	PLC-10	71	-	-	-	Left	2.3	N0	IIA	IIA	46	Yes	No	Solid	NOS	No	3	2	1	Luminal A	90%(2)	Negative	20% (1)	0.11	2	Negative	100% (3)	100% (2)	Positive 80%	Weak Cytoplasm	C	16	0.01	Negative
	PLC-11	50	-	-	-	Right	1.8	N1	IIA	IA	35	No	No	Trabecular	NOS	No	2	1	1	Luminal A	78% (3)	65%(3)	20% (1)	0.11	0	Negative	100% (3)	100% (2)	Positive 90%	Negative	C	46	Negative	Negative
	PLC-12	78	-	-	-	Left	4.7	N3	IIIC	IIIA	43	Yes	No	Solid	Histyocitoid	No	2	1	1	Triple Negative	Negative	Negative	45% (2)	0.03	1	Negative	100% (3)	100% (3)	Positive 50%	Negative	C+N	38	0.01	0.1
	PLC-13	60	-	-	-	Right	1.5	N0	IA	IA	29	No	No	Trabecular	NOS	No	2	1	1	Luminal A	75% (2)	90% (3)	65% (2)	0.08	1	Negative	100% (2)	100% (1)	Positive 50%	Negative	C	13	0.01	Negative
	PLC-14	73	-	-	-	Left	2.8	N1	IIB	IIA	25	No	No	Solid	NOS with osteoclast cells	No	2	1	1	Luminal B	78% (2)	Negative	70% (2)	0.16	0	Negative	100% (3)	100% (2)	Positive 90%	Weak Cytoplasm	C	90	Negative	Negative
	PLC-15	76	-	-	-	Left	3.5	N1	IIB	IA	25	No	No	Trabecular	NOS	No	3	2	1	Luminal B	22% (2)	15% (3)	Negative	0.2	1	Negative	100% (3)	100% (2)	Positive 100%	Negative	C	65	0.01	0.01
	PLC-16	67	-	-	-	Right	2.1	N1	IIB	IIA	24	No	No	Trabecular	NOS	No	3	3	1	Luminal A	40% (2)	15% (2)	Negative	0.01	1	Negative	100% (3)	100% (2)	Positive 90%	Negative	C	40	Negative	Negative
	PLC-17	72	-	-	-	Left	2.8	N1	IIB	IIIA	19	No	No	Trabecular	Apocrine	Yes	2	1	1	HER2 enriched	Negative	Negative	20% (1)	0.22	3	Negative	100% (3)	100% (3)	Positive 80%	Negative	C+N	26	Negative	Negative
	PLC-18	64	Yes	-	-	Left	3.2	N1	IIB	IIA	70	No	No	Classic	Histyocitoid	No	2	1	1	Luminal A	70% (3)	Negative	25% (1)	0.03	0	Aberrant	100% (3)	100% (2)	Positive 80%	Weak Cytoplasm	C	25	Negative	Negative
	PLC-19	62	Yes	-	-	Left	0.7	N1	IIA	IIA	77	Yes	No	Classic	NOS	No	2	1	1	Luminal A	50% (3)	65% (3)	25% (1)	0.01	0	Negative	100% (3)	100% (2)	Positive 90%	Negative	C+N	65	Negative	Negative
	PLC-20	74	Yes	-	-	Right	2.7	N0	IIA	IIA	20	No	No	Trabecular	Histyocitoid	No	2	1	1	Luminal B	45% (1)	12% (2)	90% (3)	0.16	0	Negative	100% (3)	100% (2)	Positive15%	Negative	C+N	36	Negative	Negative
	PLC-21	41	Yes	-	-	Right	1.2	N0	IA	IA	55	No	No	Trabecular	Histyocitoid	No	2	1	1	Luminal A	38% (2)	53% (2)	Negative	0.12	1	Negative	100% (3)	100% (1)	Positive 100%	Negative	C	54	Negative	Negative
	PLC-22	58	Yes	-	-	Right	1.2	N0	IA	IA	8	No	No	Solid	NOS	No	2	1	1	Luminal A	60% (3)	Negative	50% (1)	0.03	0	Aberrant	100% (3)	100% (2)	Positive 90%	Moderate Cytoplasm	C	12	Negative	Negative
	PLC-23	45	Yes	Yes	-	Right	6	N1	IIIA	IIIA	67	Yes	No	Trabecular	NOS	No	2	2	1	Luminal A	75% (2)	90% (3)	40% (1)	0.08	0	Negative	100% (3)	100% (2)	Positve 90%	Negative	C	20	Negative	Negative
	PLC-24	67	-	Yes	-	Left	8	N3	IIIC	IIA	19	Yes	YES	Solid	Histyocitoid	No	2	1	1	Luminal B	75% (2)	Negative	Negative	0.18	2	Negative	0	100% (2)	Positive 90%	Weak Cytoplasm	C weak	25	Negative	Negative
	PLC-25	67	-	Yes	-	Left	1.5	N3	IIIC	IA	14	No	No	Trabecular	Apocrine	Yes	3	2	1	Triple Negative	Negative	Negative	90% (3)	0.11	0	Negative	100% (2)	100% (2)	Positive 90%	Weak Cytoplasm	C	14	0.01	TILS
	PLC-26	87	-	Yes	-	Left	3.6	N3	IIIC	IIB	11	Yes	No	Solid	Histyocitoid	No	3	2	1	Luminal A	80% (3)	100% (3)	20% (1)	0.16	1	Negative	100% (3)	100% (2)	Positive 60%	Moderate Cytoplasm	C	41	0.01	0.01
	PLC-27	55	Yes	-	Yes	Left	1.1	N0	IA	IIA	70	Yes	No	Trabecular	NOS	No	2	1	1	Luminal A	30% (1)	45% (2)	60% (1)	0.1	0	Negative	100% (3)	100% (2)	Negative 5%	Negative	C+N	50	Negative	Negative
																															M= Membrane
																															C=Citoplasm
																															N=Nucleus

## Sheet: Table S2
Table S2	List of antibodies used to characterise PLC tumours
Protein	Catalogue #	Company	City	Country	Dilution
oestrogen receptor (ER)	#IS084	DAKO	Glostrup	Denmark	ready to use
progesterone receptor (PR)	#IR068	DAKO	Glostrup	Denmark	ready to use
androgen receptor (AR)	clone AR441, cat. #M3562	DAKO	Glostrup	Denmark	1:100
Ki67	clone MIB-1, cat. #GA 626	DAKO	Glostrup	Denmark	ready to use
her2	HercepTest for Automated Link Platforms, Kit system, pharmDx, cat. #SK001	DAKO	Glostrup	Denmark	ready to use
p53	#IR616	DAKO	Glostrup	Denmark	ready to use
E-cadherin	#IR059	DAKO	Glostrup	Denmark	ready to use
B-catenin	#GA702	DAKO	Glostrup	Denmark	ready to use
p-120 catenin	clone 98, cat #790-4517	Ventana Medical Systems	Tuscon	USA	ready to use
ARID1A	#HPA005456	Sigma	St Louis	USA	1:500
ARID1B	#H0057492	Novusbio	Littleton	USA	1:700
PD-L1	IHC 28-8 pharmDx for Autostainer Link 48, cat #SK005	DAKO	Glostrup	Denmark	ready to use
CD8	#GA623	DAKO	Glostrup	Denmark	ready to use

## Sheet: Table S3
Table S3	List of mutations found in the invasive component of the 27 PLCs subjected to NGS analysis
Sample	AKT1	ARID1A	ARID1B	BRCA2	CASP8	CDH1	ERBB2	GATA3	KMT2C	MAP3K1	NCOR1	NF1	PGAP3	PIK3CA	RB1	TBX3	TP53	Amp_chr3_PIK3CA	Amp_chr8_FGFR1	Amp_chr11	Amp_chr17
PLC-1						A617T;c.2238_2242delTGACA											Y220C
PLC-2		c.3980_3981insGCAGCA				c.692_702delTCTCTCACGCT								Y644H;H1047R
PLC-3						Q23*	E717K
PLC-4												R897W								YES
PLC-5		T1065I				c.687+1G>T			K4253*
PLC-6						c.2349_2350delTC	L869R			c.2242_2245delTCAA
PLC-7						W156G
PLC-8						c.1449_1450insC				c.3138delT				E545K;H1047R
PLC-9			G568R				L755S			Q1207*				H1047R
PLC-10						c.1565+1G>A								H1047R	S513*				YES
PLC-11						c.1332dupT													YES
PLC-12	E17K		c.364_369dupCAGCAG			c.1744dupC		c.925-3_925-2delCA
PLC-13			c.954_956delAGG			Q16*			A286P
PLC-14						c.866delC						A2511T
PLC-15		c.60_62delGCC	c.811_812insCCGCCG			E497*	L755S			c.2873_2876dupCAAA;c.3667-1G>A
PLC-16					c.493dupG	c.163+2T>G	L755S
PLC-17			c.961_963dupGGA			c.684_687+4dupCACTGTAA			c.3323+2T>C		M940I						E286K				YES
PLC-18						c.2164+1G>C								H1047R			R175H
PLC-19						c.211delC	S310Y		Y2218*					E542K;Y644H
PLC-20	E17K					c.2223dupA											c.550_551delGA
PLC-21			c.954_956delAGG			Q351*		c.925-3_925-2delCA		c.819_820delAG				H1047R
PLC-22						c.531+1G>C	L755S														YES
PLC-23						c.1523dupA								H1047R						YES
PLC-24		S634*																		YES
PLC-25				K1018R		c.757_761delACCGA							D67G			c.1717_1718insGG
PLC-26						c.2121delT			R2647S							c.269_270dupTG
PLC-27						c.1936+1G>C								E545K			R342*	YES
Doubtful Germline

## Sheet: Table S4
Table S4	Estimation of LOH status based on the calculation of Ti
Sample	TC(%)	Gene	Mutation	Var_frequency	Ti	wTi
PLC-1	70	CDH1	A617T	0.44	0.538462	0.446923
			c.2238_2242delTGACA	0.15	0.538462	0.446923
PLC-2	90	CDH1	c.692_702delTCTCTCACGCT	0.25	0.818182	0.679091
		ARID1A	c.3980_3981insGCAGCA	0.36	0.818182	0.679091
PLC-3	70	CDH1	Q23*	0.41	0.538462	0.446923
PLC-4	80	CDH1	-	-	0.666667	0.553333
PLC-5	60	CDH1	c.687+1G>T	0.82	0.428571	0.355714
		ARID1A	T1065I	0.630435	0.428571	0.355714
PLC-6	50	CDH1	c.2349_2350delTC	0.31	0.333333	0.276667
PLC-7	45	CDH1	W156G	0.24	0.290323	0.240968
PLC-8	50	CDH1	c.1449_1450insC	0.53	0.333333	0.276667
PLC-9	50	CDH1	-	-	0.333333	0.276667
PLC-10	90	CDH1	c.1565+1G>A	0.69	0.818182	0.679091
PLC-11	60	CDH1	c.1332dupT	0.34	0.428571	0.355714
PLC-12	60	CDH1	c.1744dupC	0.22	0.428571	0.355714
PLC-13	N/A	CDH1	Q16*	0.5	NA	NA
PLC-14	N/A	CDH1	c.866delC	0.28	NA	NA
PLC-15	60	CDH1	E497*	0.33	0.428571	0.355714
		ARID1A	c.60_62delGCC	0.13	0.428571	0.355714
PLC-16	60	CDH1	c.163+2T>G	0.53	0.428571	0.355714
PLC-17	70	CDH1	c.684_687+4dupCACTGTAA	0.39	0.538462	0.446923
PLC-18	50	CDH1	c.2164+1G>C	0.37	0.333333	0.276667
PLC-19	N/A	CDH1	c.211delC	0.15	NA	NA
PLC-20	40	CDH1	c.2223dupA	0.18	0.25	0.2075
PLC-21	60	CDH1	Q351*	0.19	0.428571	0.355714
PLC-22	50	CDH1	c.531+1G>C	0.26	0.333333	0.276667
PLC-23	60	CDH1	c.1523dupA	0.58	0.428571	0.355714
PLC-241		CDH1	-	-	0.333333	0.276667
	50	ARID1A	S634*	0.15	0.333333	0.276667
	65	ARID1A	S634*	0.48	0.481481	0.39963
PLC-25	70	CDH1	c.757_761delACCGA	0.68	0.538462	0.446923
PLC-26	80	CDH1	c.2121delT	0.52	0.666667	0.553333
PLC-27	40	CDH1	c.1936+1G>C	0.28	0.25	0.2075
1 Primary tumour (top) and metastatic component (bottom)

## Sheet: Table S5
Table S5	List of infrequent germline variants identified in the 27 PLCs subjected to NGS analysis
Gene	Variant	GMAF	SE(107)	EUR	ID	#Cases	#Expected_Cases GMAF	#Expected_Cases SE	#Expected_Cases EUR
ARID1B	c.1348_1350dupCCG	0.025	0.051	0.068	rs572236007	3	1.31625	2.61355	3.4223
BRCA1	Q356R	0.028	0.079	0.06	rs1799950	2	1.46966	3.92899	3.0456
	D693N	0.039	0.084	0.083	rs4986850	2	2.02387	4.15498	4.10999
	S1140G	0.01	0.002	0.001	rs2227945	1	0.5346	0.107784	0.053946
	S186Y	0.003	NA	NA	rs55688530	1	0.161514	-	-
BRCA2	c.3860delA	pathogenic	pathogenic	pathogenic		1	-	-	-
	T1011R	NA	NA	NA	rs80358548	1	-	-	-
	D1420Y	0.004	0.005	0.008	rs28897727	1	0.215136	0.26865	0.428544
	R2272I	0.0002	NA	NA	rs199522406	1	0.0107978	-	-
	R2034C	0.001	0.005	0.003	rs1799954	1	0.053946	0.26865	0.161514
ERBB2	A356D	0.001	NA	NA	rs141116145	2	0.053946	-	-
ESR1	G160C	0.0006	NA	NA	rs149308960	1	0.0323806	-	-
KMT2C	L4219V	0.003	NA	NA	rs139111507	1	0.161514	-	-
	P2412T	0.008	0.033	0.026	rs13231116	3	0.428544	1.72319	1.3675
	I455M	0.01	0.033	0.046	rs77652527	1	0.5346	1.72319	2.36974
MYC	N26S	0.015	0.079	0.047	rs4645959	3	0.79785	3.92899	2.41871
NCOR1	A2182T	0.0022	0.009	0.008	rs61753149	1	0.118539	0.481626	0.428544
	Y2147*	0.0014	NA	NA	rs144480346	1	0.0754942	-	-
PIK3CA	Y644H	NA	NA	NA	rs17849072	2	-	-	-
ZNF217	R903Q	0.011	0.023	0.037	rs61748378	2	0.587466	1.21343	1.92407
	T43N	0.0002	NA	NA	rs139129142	1	0.0107978	-	-
ruled out as putative pathogenic variants

## Sheet: Table S6
Table S6	List of mutations found in the different components of 10 PLCs subjected to NGS analysis
Case	Type	AKT1	ARID1A	ARID1B	BRCA2	CDH1	ERBB2	GATA3	KMT2C	MAP3K1	PGAP3	PIK3CA	TBX3	TP53	ZNF703	Amp_chr3_PIK3CA	Amp_chr11
PLC-18	In-Situ					c.2164+1G>C						H1047R
	Invasive					c.2164+1G>C						H1047R		R175H
PLC-19	In-Situ					c.211delC	S310Y;V777L		Y2218*			E542K;Y644H
	Invasive					c.211delC	S310Y		Y2218*			E542K;Y644H
PLC-20	In-Situ	E17K				c.2223dupA								c.550_551delGA
	Invasive	E17K				c.2223dupA								c.550_551delGA
PLC-21	In-Situ			c.954_956delAGG		Q351*		c.925-3_925-2delCA		c.819_820delAG		H1047R
	Invasive			c.954_956delAGG		Q351*		c.925-3_925-2delCA		c.819_820delAG		H1047R
PLC-22	In-Situ					c.531+1G>C	L755S										?
	Invasive					c.531+1G>C	L755S										YES
PLC-23	In-Situ					c.1523dupA						H1047R
	Invasive					c.1523dupA						H1047R					YES
	Metastatic					c.1523dupA						H1047R					YES
PLC-24	Invasive		S634*														YES
	Metastatic		S634*/LOH														YES
PLC-25	Invasive				K1018R	c.757_761delACCGA					D67G		c.1717_1718insGG
	Metastatic				K1018R	c.757_761delACCGA					D67G		c.1717_1718insGG
PLC-26	Invasive					c.2121delT			R2647S				c.269_270dupTG
	Metastatic					c.2121delT			R2647S				c.269_270dupTG
PLC-27	In-Situ					c.1936+1G>C						E545K
	Invasive					c.1936+1G>C						E545K		R342*		YES
	Relapse					c.1936+1G>C						E545K		R342*	S221F	YES
Doubtful Germline
